# Supplementary material for: Spermine and spermidine modulate T-cell function in older adults with and without cognitive decline ex vivo
Source: publisher site journal article supplement (doi:10.18632/aging.103527), 2020-06-30
Supplement: Supplementary file [file aging-v12i13-103527-supplementary-material-SD2.pdf]

**SUPPLEMENTARY TABLE**

**Supplementary Table 1.**

| Spermine<br>concentration<br>in $\mu$ M              | 5       |    | 10      |    | 100     |     | 1000    |     | 2000    |     |
|------------------------------------------------------|---------|----|---------|----|---------|-----|---------|-----|---------|-----|
|                                                      | control | CD | control | CD | control | CD  | control | CD  | control | CD  |
| IL-2                                                 |         |    | ↓       | ** | ↓       | *** | ↓       | *** | ↓       | *** |
| IL-4                                                 | ↓       | *  | ↓       | *  | ↓       | *   | ↓       | **  | ↓       | **  |
| IL-5                                                 |         |    | ↓       |    | ↓       | **  | ↓       | **  | ↓       | **  |
| IL-9                                                 |         |    | ↓       | *  | ↓       | *** | ↓       | *** | ↓       | *** |
| IL-10                                                |         |    |         |    | ↓       |     | ↓       | **  | ↓       | **  |
| IL-13                                                |         | ↓  | *       | ↓  | *       | ↓   | **      | ↓   | **      | ↓   |
| IL-17A                                               |         |    |         |    | ↓       |     | ↓       | *   | ↓       | *   |
| IL-17F                                               |         |    |         |    | ↓       |     | ↓       | **  | ↓       | **  |
| IL-22                                                |         |    |         |    | ↓       |     | ↓       | *** | ↓       | *** |
| INF- $\gamma$                                        |         |    |         |    | ↓       |     | ↓       | *** | ↓       | *** |
| TNF- $\alpha$                                        |         | ↓  | **      | ↓  | *       | ↓   | **      | ↓   | **      | ↓   |
| <b>Spermidine concentration in <math>\mu</math>M</b> |         |    |         |    |         |     |         |     |         |     |
|                                                      | 5       |    | 10      |    | 100     |     | 1000    |     | 2000    |     |
|                                                      | control | CD | control | CD | control | CD  | control | CD  | control | CD  |
| IL-2                                                 |         |    |         | ↑  | *       |     | ↓       | *** | ↓       | *** |
| IL-4                                                 |         |    |         |    |         |     | ↓       | *   | ↓       | *   |
| IL-5                                                 |         |    |         |    |         | ↑   | *       | ↓   | **      | ↓   |
| IL-9                                                 |         |    |         | ↑  | ***     | ↑   | **      | ↓   | *       | ↓   |
| IL-10                                                |         |    |         |    |         |     | ↓       | *   | ↓       | *** |
| IL-13                                                |         |    |         |    |         | ↑   | *       | ↓   |         | ↓   |
| IL-17A                                               |         |    | ↑       | ** | ↑       | *** | ↑       | **  | ↑       | *** |
| IL-17F                                               |         |    |         |    | ↑       | **  | ↑       | *   | ↑       | *** |
| IL-22                                                |         | ↓  | *       |    |         |     |         | ↓   | ***     | ↓   |
| INF- $\gamma$                                        |         | ↑  | *       | ↑  | *       | ↑   | ***     |     |         | ↓   |
| TNF- $\alpha$                                        |         | ↑  | **      | ↑  | ***     | ↑   | *       | ↑   | **      | ↓   |
